# Supplementary material
Source: HighWire-hosted journal article supplement (https://jnnp.bmj.com/content/90/3/342)
Supplement: inline-supplementary-material-1 [file inline-supplementary-material-1.pdf]

Supplementary Table S1: Clinical characteristics of pure small fiber neuropathy patients with a (potentially) pathogenic SCN9A variant

| c position                      | Gender | Age | Age debut | EMFD (5th percentile) | EMFD     | TTT      | Associated condition(s)   | Erythromalgia | Ich | Cramps | Family history | Actual VAS | VASmin | VASmax | NPS Pain Severity | Sharpness | Hottness | Dullness | Coldness | Sensitivity | Itchiness | Unpleasantness | Intensity deep pain | Intensity surface pain | SPN-SDQ No. autonomic | SPN-SDQ No. somatic | Neuropathic pain medication at moment hospital visit            |                                                                                |
|---------------------------------|--------|-----|-----------|-----------------------|----------|----------|---------------------------|---------------|-----|--------|----------------|------------|--------|--------|-------------------|-----------|----------|----------|----------|-------------|-----------|----------------|---------------------|------------------------|-----------------------|---------------------|-----------------------------------------------------------------|--------------------------------------------------------------------------------|
| c118A>G                         | F      | 46  | 44        | 7.4 (5.7)             | Normal   | Abnormal | ↓ vitamin B12             | No            | No  | No     | Negative       | 70         | 59     | 83     | 7                 | 7         | 6        | 8        | 9        | 6           | 2         | 8              | 8                   | 7                      | 8                     | 2                   | None                                                            |                                                                                |
| c545A>G                         | F      | 40  | 38        | 6.6 (5.7)             | Normal   | Abnormal |                           | Yes           | No  | No     | Negative       | 20         | NA     | NA     | 3                 | 5         | NA       | 3        | 4        | 4           | 4         | 4              | 6                   | 6                      | 4                     | 4                   | None                                                            |                                                                                |
| c514G>A                         | M      | 52  | 22        | 1 (3.5)               | Abnormal | Abnormal |                           | Yes           | NA  | NA     | Positive       | 50         | 50     | NA     | 6                 | 7         | 8        | 0        | 0        | 7           | 0         | 7              | 0                   | 8                      | 0                     | 4                   | Pregabalin 150mg BID                                            |                                                                                |
| c534G>A                         | F      | 25  | 23        | 4.9 (8.4)             | Abnormal | Abnormal |                           | No            | Yes | NA     | Negative       | 84         | 62     | 94     | 7                 | 8         | 7        | 8        | 8        | 8           | 9         | 7              | 9                   | 7                      | 4                     | 4                   | Phenytoin                                                       |                                                                                |
| c684C>G*                        | M      | 28  | 20        | 7.5 (6.1)             | Normal   | Abnormal | Autoimmune disease        | Yes           | No  | No     | Negative       | 50         | 23     | 77     | 6                 | 4         | 8        | 0        | 1        | 1           | 0         | 6              | 6                   | 3                      | 2                     | 2                   | Lamotrigine 25mg BID                                            |                                                                                |
| c684C>G*                        | F      | 43  | 41        | 5.1 (5.7)             | Abnormal | Normal   |                           | No            | No  | No     | Negative       | 52         | 49     | 49     | 4                 | 8         | 2        | NA       | 0        | 0           | 2         | 5              | 5                   | 5                      | 5                     | 2                   | Gabapentin 300mg QID                                            |                                                                                |
| c684C>G*                        | F      | 37  | 36        | 11.1 (7.1)            | Normal   | Abnormal |                           | Yes           | No  | No     | Positive       | 41         | 38     | 78     | 7                 | 6         | 7        | 8        | 5        | 3           | 0         | 7              | 8                   | 7                      | 7                     | 4                   | None                                                            |                                                                                |
| c684C>G*                        | F      | 46  | 45        | 5.2 (5.7)             | Abnormal | Abnormal |                           | Yes           | No  | No     | Negative       | 75         | 33     | 83     | 8                 | 7         | 8        | 3        | 0        | 8           | 0         | 8              | 3                   | 9                      | 4                     | 2                   | None                                                            |                                                                                |
| c684C>G*                        | F      | 54  | 51        | 8.3 (4.3)             | Normal   | Abnormal | ↓ vitamin B12             | No            | No  | No     | Positive       | 49         | 46     | 94     | 8                 | 9         | 9        | 9        | 6        | 10          | 5         | 9              | 9                   | 6                      | 9                     | 4                   | None                                                            |                                                                                |
| c684C>G*                        | F      | 41  | 33        | 11.1 (5.7)            | Abnormal | Abnormal | ↓ vitamin B12             | Yes           | No  | No     | Positive       | NA         | NA     | NA     | 8                 | 8         | 4        | 7        | 9        | 4           | 7         | 8              | 8                   | 7                      | 8                     | 3                   | Gabapentin 900mg TID                                            |                                                                                |
| c684C>G*                        | M      | 51  | 17        | 1.6 (3.5)             | Abnormal | Abnormal |                           | Idiopathic    | No  | No     | Negative       | 68         | 18     | 88     | 7                 | 8         | 3        | 3        | 4        | 4           | 1         | 7              | 7                   | 4                      | 9                     | 4                   | None                                                            |                                                                                |
| c1007A>C                        | M      | 40  | 37        | 8.5 (4.4)             | Normal   | Abnormal |                           | No            | No  | No     | Positive       | NA         | NA     | NA     | NA                | NA        | NA       | NA       | NA       | NA          | NA        | NA             | NA                  | NA                     | NA                    | NA                  | None                                                            |                                                                                |
| c1520G>T                        | M      | 38  | 37        | 6.1 (5.2)             | Normal   | Abnormal | Autoimmune disease        | Yes           | No  | No     | Negative       | NA         | NA     | NA     | NA                | NA        | NA       | NA       | NA       | NA          | NA        | NA             | NA                  | NA                     | NA                    | NA                  | None                                                            |                                                                                |
| c1520G>T                        | M      | 38  | 37        | 6.1 (5.2)             | Normal   | Abnormal | Autoimmune disease and DM | Yes           | No  | No     | Negative       | 79         | 24     | 92     | 8                 | 8         | 6        | 4        | 1        | 3           | 7         | 7              | 6                   | 7                      | 9                     | 4                   | Tramadol and oxycodone on occasion                              |                                                                                |
| c1555G>A                        | F      | 44  | 35        | 7.5 (5.7)             | Normal   | Abnormal |                           | Idiopathic    | Yes | No     | Positive       | 67         | NA     | 86     | 7                 | 8         | 6        | 7        | 10       | 9           | 0         | 7              | 8                   | NA                     | 5                     | 4                   | None                                                            |                                                                                |
| c1555G>A**                      | F      | 63  | 60        | 1.0 (3.2)             | Abnormal | Abnormal | IGT                       | Yes           | No  | No     | NA             | 36         | 21     | 65     | 5                 | 6         | 7        | 5        | 6        | 5           | 3         | 5              | 3                   | 3                      | 6                     | 4                   | Gabapentin 300mg daily                                          |                                                                                |
| c1592A>C                        | F      | 26  | 25        | 8 (8.4)               | Abnormal | Normal   |                           | Idiopathic    | Yes | No     | Negative       | 75         | 7      | 74     | 8                 | 7         | 10       | 0        | 0        | 0           | 0         | NA             | NA                  | NA                     | 2                     | 1                   | None                                                            |                                                                                |
| c1867G>A*                       | F      | 64  | 59        | 2.8 (3.2)             | Abnormal | Abnormal |                           | Idiopathic    | Yes | Yes    | Positive       | 87         | 87     | 96     | 9                 | 8         | 7        | 7        | 9        | 9           | 7         | 8              | 9                   | 7                      | 6                     | 4                   | None                                                            |                                                                                |
| c2033A>C                        | M      | 54  | 50        | 7.7 (3.5)             | Normal   | Abnormal |                           | Idiopathic    | Yes | No     | Negative       | 70         | 53     | 88     | 8                 | 8         | 8        | 0        | 0        | 8           | 0         | NA             | NA                  | NA                     | NA                    | 8                   | 4                                                               | Duloxetine 120mg daily, oxycodone extended release 10mg TID, oxycodone 5mg QID |
| c2128G>G                        | F      | 21  | 16        | 4.7 (8.5)             | Abnormal | Normal   |                           | Idiopathic    | Yes | No     | Positive       | 64         | 0      | 85     | 7                 | 5         | 8        | 7        | 0        | 5           | 0         | 6              | 7                   | 5                      | 5                     | 3                   | None                                                            |                                                                                |
| c2157G>C                        | F      | 46  | 39        | 6.9 (5.7)             | Normal   | Abnormal |                           | Idiopathic    | Yes | No     | Positive       | NA         | NA     | NA     | 9                 | 9         | 3        | 9        | 9        | 9           | 1         | 9              | 9                   | 9                      | 1                     | 1                   | Tramadol hydrochloride/paracetamol                              |                                                                                |
| c2159T>A*                       | F      | 65  | 63        | 3.7 (3.2)             | Normal   | Abnormal |                           | Idiopathic    | No  | No     | Positive       | NA         | NA     | NA     | 4                 | 5         | 5        | 6        | 5        | 2           | 2         | NA             | 2                   | 2                      | 4                     | 3                   | None                                                            |                                                                                |
| c2159T>A*                       | M      | 39  | 38        | 4.5 (3.2)             | Abnormal | Abnormal |                           | Idiopathic    | No  | No     | Negative       | 56         | 34     | 74     | 7                 | 6         | 7        | 7        | 8        | 3           | 0         | 7              | 8                   | 7                      | 6                     | 4                   | NA                                                              |                                                                                |
| c2215A>G                        | F      | 28  | 26        | 7.7 (8.4)             | Abnormal | Abnormal |                           | Idiopathic    | No  | No     | Negative       | 77         | 56     | 89     | 8                 | 8         | NA       | 9        | 1        | 8           | 7         | NA             | NA                  | NA                     | 8                     | 4                   | Oxycodone 5mg 4 to 8 times a day, pregabalin 75mg 6 times a day |                                                                                |
| c2215A>G                        | M      | 65  | 61        | 3.2 (3.8)             | Normal   | Abnormal |                           | Idiopathic    | Yes | Yes    | Negative       | 45         | 7      | 46     | 6                 | 0         | 9        | 0        | 6        | 10          | 0         | 10             | 2                   | 10                     | 2                     | 1                   | None                                                            |                                                                                |
| c2215A>G                        | F      | 56  | 53        | 1.8 (3.3)             | Abnormal | Normal   | Autoimmune disease        | No            | No  | No     | Negative       | 76         | 49     | 94     | 8                 | 8         | 8        | 7        | 6        | 6           | 0         | 8              | 8                   | 7                      | 8                     | 4                   | None                                                            |                                                                                |
| c2215A>G                        | M      | 70  | 68        | 1 (2.2)               | Abnormal | Abnormal |                           | Idiopathic    | No  | No     | Negative       | 22         | 21     | NA     | 7                 | 8         | 7        | 6        | 3        | 2           | 2         | 5              | 3                   | 7                      | 2                     | 2                   | Pregabalin 75mg BID                                             |                                                                                |
| c2215A>G                        | F      | 48  | 41        | NA                    | Normal   | Abnormal |                           | Idiopathic    | Yes | No     | Positive       | 46         | 22     | 86     | 7                 | 8         | 7        | 7        | 4        | 8           | 4         | 9              | 7                   | 8                      | 0                     | 4                   | None                                                            |                                                                                |
| c2215A>G                        | M      | 59  | 39        | 2.2 (3.5)             | Abnormal | Abnormal |                           | Idiopathic    | No  | Yes    | Negative       | NA         | NA     | NA     | 9                 | 9         | 7        | 3        | 1        | 1           | 1         | 8              | 8                   | 8                      | 7                     | 4                   | Pregabalin, duloxetine                                          |                                                                                |
| c2215A>G                        | F      | 51  | 14        | 3.4 (8.3)             | Abnormal | Abnormal |                           | Idiopathic    | Yes | Yes    | Positive       | 53         | 46     | NA     | 6                 | 8         | 6        | 4        | 2        | 8           | 6         | 7              | 8                   | 5                      | 0                     | 4                   | Duloxetine                                                      |                                                                                |
| c2215A>G                        | M      | 67  | 61        | 0                     | Abnormal | Abnormal |                           | Idiopathic    | No  | No     | Negative       | 78         | 27     | 85     | NA                | NA        | 8        | 2        | 0        | 8           | 1         | 6              | 6                   | 8                      | 7                     | 3                   | None                                                            |                                                                                |
| c2215A>G                        | F      | 69  | 63        | 2.2 (3.2)             | Abnormal | Abnormal |                           | Idiopathic    | Yes | No     | Negative       | NA         | NA     | NA     | NA                | NA        | NA       | NA       | NA       | NA          | NA        | NA             | NA                  | NA                     | NA                    | NA                  | Pregabalin 75mg TID                                             |                                                                                |
| c2215A>G                        | F      | 50  | 46        | 4.5 (3.3)             | Normal   | Abnormal |                           | Idiopathic    | Yes | No     | Negative       | NA         | NA     | NA     | 5                 | 5         | 9        | 0        | 0        | 0           | 0         | 7              | 6                   | 6                      | 8                     | 3                   | Pregabalin                                                      |                                                                                |
| c2215A>G                        | F      | 75  | 70        | 6.7 (2.2)             | Normal   | Abnormal | DM                        | No            | No  | No     | Negative       | 64         | 29     | 83     | 7                 | 6         | 8        | 8        | 0        | 0           | 5         | 1              | 5                   | 6                      | 4                     | 8                   | 3                                                               | None                                                                           |
| c2215A>G                        | M      | 35  | 27        | 5.1 (5.2)             | Abnormal | Abnormal | Alcohol abuse             | No            | Yes | No     | Positive       | 56         | 28     | 87     | 6                 | 7         | 8        | 0        | 5        | 6           | 0         | 9              | 9                   | 6                      | 5                     | 4                   | Amitriptyline 10mg BID                                          |                                                                                |
| c2215A>G                        | F      | 66  | 64        | 2.8 (3.2)             | Abnormal | Abnormal |                           | Idiopathic    | No  | No     | Negative       | 83         | 25     | 94     | 9                 | 9         | 7        | 7        | 6        | 8           | 0         | 8              | 7                   | 9                      | 8                     | 3                   | Gabapentin 800mg TID, tramadol 50mg TID                         |                                                                                |
| c2215A>G                        | F      | 65  | 62        | 9.7 (3.2)             | Abnormal | Abnormal |                           | Idiopathic    | No  | No     | Negative       | 91         | 71     | 95     | 9                 | 9         | 7        | 8        | 8        | 9           | 8         | 9              | 9                   | 8                      | 7                     | 4                   | Duloxetine 30mg QID, buprenorphine transdermal                  |                                                                                |
| c2266A>A                        | F      | 71  | 63        | 6.4 (2.2)             | Normal   | Abnormal |                           | Idiopathic    | No  | No     | Negative       | NA         | NA     | NA     | 7                 | 10        | 10       | 2        | 0        | 8           | 3         | 10             | 10                  | 7                      | 3                     | 1                   | Pregabalin 75mg daily                                           |                                                                                |
| c2271G>A                        | F      | 68  | 48        | 1 (3.2)               | Normal   | Abnormal | Autoimmune disease        | Yes           | No  | Yes    | Negative       | NA         | NA     | NA     | 7                 | 9         | 6        | 7        | 5        | 8           | 9         | 9              | 10                  | 5                      | 3                     | 3                   | Duloxetine 60mg daily                                           |                                                                                |
| c2367G>A*                       | M      | 68  | NA        | 3.7 (2.8)             | Normal   | Abnormal | NA                        | No            | No  | No     | Positive       | 0          | 0      | 0      | 0                 | 0         | 0        | 0        | 0        | 0           | 0         | 0              | 0                   | 0                      | 0                     | 1                   | None                                                            |                                                                                |
| c2794A>C/c.2971G>T*             | F      | 62  | 59        | 5.4 (3.2)             | Normal   | Abnormal |                           | Idiopathic    | No  | No     | Negative       | 60         | 28     | 81     | 6                 | 6         | 7        | 5        | 1        | 8           | 2         | NA             | NA                  | NA                     | 9                     | 4                   | None                                                            |                                                                                |
| c2794A>C/c.2971G>T*             | M      | 21  | 16        | 4 (6.1)               | Abnormal | Abnormal |                           | Idiopathic    | No  | No     | Positive       | 7          | 7      | 11     | 4                 | 6         | 7        | 4        | 0        | 1           | 1         | 6              | 7                   | 5                      | 7                     | 2                   | None                                                            |                                                                                |
| c2794A>C/c.2971G>T*             | F      | 36  | 34        | 6.4 (7.1)             | Abnormal | Abnormal | Autoimmune disease        | Yes           | No  | Yes    | NA             | 87         | 80     | 100    | 9                 | 9         | 8        | 9        | 10       | 7           | 6         | 10             | 10                  | 8                      | 9                     | 4                   | Amitriptyline                                                   |                                                                                |
| c2794A>C/c.2971G>T*             | M      | 27  | 19        | 7.4 (6.1)             | Normal   | Abnormal | Autoimmune disease        | No            | No  | Yes    | Negative       | 88         | 39     | 100    | 9                 | 9         | 8        | 9        | 7        | 10          | 0         | 9              | 9                   | 9                      | 7                     | 4                   | None                                                            |                                                                                |
| c2794A>C/c.2971G>T*             | M      | 21  | 13        | 10.2 (6.1)            | Normal   | Abnormal |                           | Idiopathic    | No  | No     | NA             | 77         | 47     | 95     | 9                 | 9         | 8        | 8        | 3        | 8           | 0         | 8              | 8                   | 7                      | 4                     | 3                   | None                                                            |                                                                                |
| c2794A>C/c.2971G>T*             | M      | 50  | 49        | 0.6 (3.5)             | Abnormal | Abnormal | Autoimmune disease        | No            | No  | No     | NA             | 29         | 13     | 59     | 4                 | 5         | 3        | 1        | 1        | 0           | 1         | 5              | 4                   | 3                      | 5                     | 2                   | None                                                            |                                                                                |
| c2794A>C/c.2971G>T* + c.4612T>C | F      | 44  | 42        | 8.1 (5.7)             | Normal   | Abnormal |                           | Idiopathic    | No  | No     | Negative       | 68         | 27     | 78     | 6                 | 7         | 6        | 7        | 6        | 9           | 5         | 5              | 8                   | 7                      | 9                     | 4                   | Gabapentin 300mg QID, duloxetine 60mg daily                     |                                                                                |
| c2794A>C/c.2971G>T* + c.4612T>C | M      | 58  | 56        | 9.6 (3.5)             | Normal   | Abnormal | Autoimmune disease        | No            | No  | No     | Negative       | 80         | 21     | 73     | 8                 | 8         | 9        | 7        | 8        | 8           | 6         | 8              | 5                   | 9                      | 6                     | 4                   | None                                                            |                                                                                |
| c2869A>G                        | M      | 67  | 63        | 7.8 (2.8)             | Normal   | Abnormal | Autoimmune disease        | No            | No  | No     | Negative       | 71         | 19     | 87     | 8                 | 8         | 9        | 3        | 8        | 9           | 0         | 8              | 8                   | 4                      | 3                     | 1                   | Amitriptyline, lidoacaine gel, oxycodone 5mg TID                |                                                                                |
| c3889T>C                        | F      | 27  | 26        | 4.5 (8.4)             | Abnormal | Normal   |                           | Idiopathic    | Yes | No     | Positive       | NA         | NA     | NA     | 4                 | 0         | 6        | 7        | 8        | 1           | 6         | 5              | 1                   | 7                      | 5                     | 3                   | None                                                            |                                                                                |
| c3836G>A                        | M      | 64  | 59        | 7 (2.8)               | Normal   | Abnormal |                           | Idiopathic    | Yes | No     | Negative       | NA         | NA     | NA     | NA                | NA        | NA       | 8        | NA       | NA          | NA        | NA             | NA                  | NA                     | 8                     | 4                   | None                                                            |                                                                                |
| c4585_4590A>G>G>C>A>A           | F      | 42  | 40        | 9.1 (5.7)             | Normal   | Abnormal |                           | Idiopathic    | Yes | No     | NA             | NA         | NA     | NA     | NA                | NA        | NA       | NA       | NA       | NA          | NA        | NA             | NA                  | NA                     | NA                    | NA                  | None                                                            |                                                                                |
| c4596G>A                        | F      | 70  | 68        | 2.3 (2.2)             | Abnormal | Abnormal |                           | Idiopathic    | Yes | No     | Negative       | 35         | 35     | 75     | 8                 | 8         |          |          |          |             |           |                |                     |                        |                       |                     |                                                                 |                                                                                |
