# Supplementary material
Source: HighWire-hosted journal article supplement (https://jnnp.bmj.com/content/90/3/342)
Supplement: inline-supplementary-material-2 [file inline-supplementary-material-2.pdf]

Supplementary Table S2: Clinical characteristics of pure small fiber neuropathy patients with a (potentially) pathogenic *SCN10A* variant

| c position           | Gender | Age | Age debut | INFD (5th percentile) | INFD     | TTT      | Associated condition(s)                | Erythromalgia | Ich | Cramps | Family history | Actual VAS | VASmin | NPS Pain Severity | Sharpness | Hottness | Dullness | Coldness | Sensitivity | Itchiness | Unpleasantness | Intensity deep pain | Intensity surface pain | SPN-SIG No. autonomic | SPN-SIG No. somatic | Neuropathic pain medication at moment hospital visit |                                                                                                 |                                                                             |
|----------------------|--------|-----|-----------|-----------------------|----------|----------|----------------------------------------|---------------|-----|--------|----------------|------------|--------|-------------------|-----------|----------|----------|----------|-------------|-----------|----------------|---------------------|------------------------|-----------------------|---------------------|------------------------------------------------------|-------------------------------------------------------------------------------------------------|-----------------------------------------------------------------------------|
| c416G>T              | F      | 59  | 55        | 5.5 (4.3)             | Normal   | Abnormal | IGT, autoimmune disease, ↑ vitamin B6  | No            | No  | No     | Negative       | 71         | 10     | 91                | 8         | 7        | 8        | 3        | 4           | 3         | 5              | 5                   | 8                      | 3                     | 7                   | 4                                                    | None                                                                                            |                                                                             |
| c416G>T              | F      | 64  | 53        | 2.6 (3.2)             | Abnormal | Abnormal | Idiopathic                             | No            | Yes | No     | Negative       | 97         | 88     | 94                | 9         | 9        | 9        | 8        | 0           | 10        | 10             | 9                   | 8                      | 9                     | 6                   | 4                                                    | None                                                                                            |                                                                             |
| c416G>T              | F      | 58  | 56        | 8.1 (4.3)             | Normal   | Abnormal | IGT, ↓ vitamin B12                     | No            | No  | No     | Negative       | 49         | 36     | 68                | 6         | 5        | 7        | NA       | 0           | 0         | 7              | 7                   | 6                      | 7                     | 3                   | 1                                                    | Pregabalin 75mg BID, duloxetine 30mg daily                                                      |                                                                             |
| c416G>T              | F      | 49  | 47        | 1.1 (5.7)             | Abnormal | Abnormal | DM, alcohol abuse                      | No            | No  | No     | Positive       | 28         | 22     | 87                | 5         | 8        | 5        | 3        | 9           | 9         | 4              | 8                   | 9                      | 6                     | 8                   | 3                                                    | Pregabalin 500mg BID                                                                            |                                                                             |
| c4266A>A             | F      | 66  | 65        | 4.2 (3.2)             | Normal   | Abnormal | Idiopathic                             | No            | No  | No     | Negative       | NA         | NA     | NA                | NA        | NA       | NA       | NA       | NA          | NA        | NA             | NA                  | NA                     | NA                    | NA                  | NA                                                   | None                                                                                            |                                                                             |
| c1141A>G             | F      | 58  | 53        | 3.1 (4.3)             | Abnormal | Abnormal | Idiopathic                             | No            | Yes | No     | Positive       | 88         | 76     | 85                | 8         | 8        | 8        | 8        | 9           | 8         | 8              | 8                   | 8                      | 8                     | 9                   | 4                                                    | None                                                                                            |                                                                             |
| c1168A>T             | F      | 47  | 45        | 7.6 (5.7)             | Normal   | Abnormal | Idiopathic                             | No            | No  | No     | Negative       | NA         | NA     | NA                | NA        | NA       | NA       | NA       | NA          | NA        | NA             | NA                  | NA                     | NA                    | NA                  | NA                                                   | None                                                                                            |                                                                             |
| c1879>C              | M      | 55  | 49        | 1.2 (3.5)             | Abnormal | Normal   | Autoimmune disease                     | Yes           | No  | No     | Negative       | 83         | 62     | 88                | 8         | 8        | 3        | 2        | 4           | 8         | 8              | 8                   | 2                      | 2                     | 0                   | Gabapentin 1200mg TID                                |                                                                                                 |                                                                             |
| c2212C>G             | F      | 73  | 70        | 8 (2.2)               | Normal   | Abnormal | Idiopathic                             | No            | No  | No     | Negative       | 25         | 13     | 61                | 3         | 4        | 5        | 3        | 6           | 6         | 2              | 6                   | 2                      | 5                     | 8                   | 4                                                    | None                                                                                            |                                                                             |
| c2972C>T             | F      | 50  | 49        | 14.2 (3.8)            | Normal   | Abnormal | Autoimmune disease                     | No            | No  | Yes    | NA             | 72         | 72     | 84                | 7         | 7        | 9        | 7        | 0           | 1         | 0              | 8                   | 8                      | 1                     | 6                   | 1                                                    | Duloxetine 30mg BID                                                                             |                                                                             |
| c2972C>T             | M      | 33  | 16        | 5.8 (5.2)             | Normal   | Abnormal | Autoimmune disease                     | No            | Yes | Yes    | Negative       | NA         | NA     | NA                | 7         | 9        | 9        | 6        | 9           | 5         | 2              | 9                   | 8                      | 7                     | 6                   | 3                                                    | None                                                                                            |                                                                             |
| c2972C>T             | F      | 20  | 15        | 10.5 (8.4)            | Normal   | Abnormal | Idiopathic                             | No            | No  | No     | Positive       | 21         | 14     | 77                | NA        | 8        | 8        | 1        | 1           | NA        | 5              | NA                  | 7                      | 9                     | 6                   | 3                                                    | None                                                                                            |                                                                             |
| c2972C>T             | F      | 37  | 36        | 7.4 (7.1)             | Normal   | Abnormal | Idiopathic                             | Yes           | No  | No     | Positive       | NA         | NA     | 9                 | 9         | 8        | 7        | 8        | 8           | 8         | 8              | 9                   | 8                      | 9                     | 4                   | None                                                 |                                                                                                 |                                                                             |
| c3482>C              | F      | 60  | 55        | 5.1 (3.2)             | Normal   | Abnormal | ↓ vitamin B12                          | No            | No  | No     | Negative       | 73         | 32     | 97                | 9         | 9        | 9        | 8        | 7           | 8         | 6              | 9                   | 8                      | 10                    | 9                   | 4                                                    | Oxycodone 25mg extended release BID, oxycodone 10mg on occasion                                 |                                                                             |
| c.3607C>T+ c.4568G>A | M      | 63  | 62        | 1.9 (2.8)             | Abnormal | Abnormal | Idiopathic                             | No            | No  | No     | Negative       | NA         | NA     | NA                | 8         | 8        | 4        | 7        | 0           | 6         | 0              | 8                   | 7                      | 8                     | 4                   | 3                                                    | Pregabalin 300mg BID                                                                            |                                                                             |
| c.3674>C             | F      | 48  | 42        | 4.5 (5.7)             | Abnormal | Abnormal | Idiopathic                             | No            | Yes | No     | Positive       | 21         | 11     | 79                | 6         | 3        | 0        | 7        | 7           | 3         | 9              | 5                   | NA                     | NA                    | 6                   | 4                                                    | Pregabalin 75mg daily                                                                           |                                                                             |
| c.3786>T             | M      | 50  | 46        | 0 (5.5)               | Abnormal | Abnormal | Idiopathic                             | Yes           | No  | No     | Negative       | 36         | 13     | 51                | 3         | 3        | 1        | 4        | 5           | 1         | 3              | NA                  | NA                     | 2                     | 4                   | None                                                 |                                                                                                 |                                                                             |
| c.3803G>A            | M      | 62  | 59        | 5 (6.8)               | Normal   | Abnormal | Autoimmune disease                     | No            | No  | No     | Negative       | 57         | 39     | 77                | 6         | 9        | 7        | 6        | 1           | 8         | 8              | 7                   | 6                      | 5                     | 9                   | 4                                                    | None                                                                                            |                                                                             |
| c.3803G>A            | M      | 49  | 48        | 9.5 (4.4)             | Normal   | Abnormal | Idiopathic                             | No            | No  | No     | Negative       | NA         | NA     | NA                | 3         | 7        | 1        | NA       | 0           | 1         | 0              | 4                   | 1                      | 5                     | 2                   | 2                                                    | None                                                                                            |                                                                             |
| c.3803G>A            | M      | 67  | 57        | 6.9 (2.9)             | Normal   | Abnormal | ↓ vitamin B12                          | No            | No  | No     | Negative       | 57         | 13     | 78                | 9         | 9        | 1        | 2        | 9           | 5         | 1              | 9                   | 8                      | 4                     | 2                   | 0                                                    | None                                                                                            |                                                                             |
| c.3803G>A            | M      | 58  | 54        | 0.1 (3.5)             | Abnormal | Abnormal | Autoimmune disease, IGT, ↓ vitamin B12 | No            | No  | No     | Negative       | NA         | NA     | NA                | 7         | 9        | 9        | 8        | 9           | 2         | 9              | 8                   | 8                      | 6                     | 8                   | 4                                                    | None                                                                                            |                                                                             |
| c.3910G>A            | F      | 57  | 47        | 9.3 (3.3)             | Normal   | Abnormal | Idiopathic                             | No            | No  | Yes    | Positive       | 28         | 30     | 78                | NA        | NA       | 8        | 1        | 7           | 3         | 0              | NA                  | 8                      | 4                     | 6                   | 4                                                    | None                                                                                            |                                                                             |
| c.4139G>A            | F      | 80  | 76        | 3 (5.0)               | Normal   | Abnormal | Idiopathic                             | No            | No  | No     | Positive       | NA         | NA     | NA                | NA        | NA       | NA       | NA       | NA          | NA        | NA             | NA                  | NA                     | NA                    | NA                  | NA                                                   | None                                                                                            |                                                                             |
| c.4378C>T            | F      | 45  | 43        | 7.8 (5.7)             | Normal   | Abnormal | Autoimmune disease + IGT               | Yes           | No  | No     | Positive       | 93         | 54     | 100               | 9         | 9        | 10       | 9        | 8           | 9         | 9              | 9                   | 10                     | 9                     | 9                   | 4                                                    | Pregabalin 75mg BID                                                                             |                                                                             |
| c.4378C>T            | M      | 52  | 51        | 10.6 (3.5)            | Normal   | Abnormal | Idiopathic                             | Yes           | No  | No     | Negative       | 68         | 20     | 94                | 9         | 9        | 10       | 4        | 7           | 7         | 6              | 9                   | 9                      | 4                     | 3                   | 3                                                    | Pregabalin 75mg BID                                                                             |                                                                             |
| c.4568G>A            | M      | 62  | 58        | 9.3 (2.8)             | Normal   | Abnormal | Idiopathic                             | Yes           | No  | No     | Negative       | 85         | 46     | 94                | 9         | 9        | 9        | 9        | 10          | 10        | 8              | 10                  | 9                      | 9                     | 8                   | 3                                                    | Pregabalin 75mg BID, tramadol on occasion                                                       |                                                                             |
| c.4568G>A            | M      | 57  | 46        | 0.8 (3.5)             | Abnormal | Abnormal | Idiopathic                             | No            | No  | No     | NA             | 55         | 15     | 70                | 5         | 5        | 6        | 8        | 8           | 8         | 2              | 4                   | 4                      | 4                     | 9                   | 4                                                    | Gabapentin 600mg TID, amitriptyline 10mg BID, tramadol hydrochloride/paracetamol 37.5/325mg TID |                                                                             |
| c.4568G>A            | F      | 39  | 32        | 7 (3.1)               | Normal   | Abnormal | Autoimmune disease                     | Yes           | No  | No     | Negative       | 75         | 36     | 87                | 8         | 8        | 6        | 7        | 6           | 6         | 7              | 7                   | 7                      | 7                     | 7                   | 4                                                    | Tramadol 50mg daily                                                                             |                                                                             |
| c.4568G>A            | M      | 58  | 57        | 4.9 (3.5)             | Normal   | Abnormal | Alcohol abuse                          | No            | No  | No     | NA             | 38         | 9      | 39                | 5         | 6        | 4        | 3        | 2           | 2         | 5              | 6                   | 5                      | 3                     | 5                   | 4                                                    | None                                                                                            |                                                                             |
| c.4568G>A            | F      | 57  | 55        | 2.9 (4.9)             | Abnormal | Abnormal | Idiopathic                             | No            | No  | No     | Positive       | 63         | NA     | 88                | 7         | 9        | 7        | 6        | 5           | 9         | 5              | 8                   | 9                      | 7                     | 6                   | 4                                                    | Pregabalin 225mg BID                                                                            |                                                                             |
| c.4568G>A            | F      | 49  | 40        | 0 (5.7)               | Abnormal | Abnormal | Idiopathic                             | No            | No  | Yes    | Positive       | NA         | NA     | NA                | NA        | NA       | NA       | NA       | NA          | NA        | NA             | NA                  | NA                     | NA                    | NA                  | NA                                                   | NA                                                                                              | Amitriptyline 25mg daily, gabapentin 600mg daily, oxycodone 5mg on occasion |
| c.4568G>A            | M      | 26  | 24        | 1.5 (6.1)             | Abnormal | Abnormal | Idiopathic                             | No            | No  | No     | Negative       | 28         | 0      | 68                | 7         | 1        | 7        | 7        | 8           | 0         | 0              | 7                   | 7                      | 4                     | 5                   | 1                                                    | None                                                                                            |                                                                             |
| c.4568G>A            | F      | 66  | 65        | 4.8 (3.2)             | Normal   | Abnormal | Idiopathic                             | No            | No  | No     | NA             | NA         | NA     | NA                | 7         | 7        | 7        | 7        | 0           | 1         | 0              | 7                   | 7                      | 7                     | 4                   | 4                                                    | Pregabalin 300mg daily                                                                          |                                                                             |
| c.4724>C             | F      | 49  | 37        | 4.6 (5.7)             | Abnormal | Abnormal | Autoimmune disease                     | No            | No  | Yes    | Positive       | 36         | 22     | 72                | 5         | 7        | NA       | NA       | 9           | NA        | 1              | NA                  | 7                      | 2                     | 9                   | 4                                                    | Amitriptyline 50mg daily                                                                        |                                                                             |
| c.4878G>A            | M      | 58  | 52        | 0.8 (3.5)             | Normal   | Abnormal | Autoimmune disease                     | No            | No  | No     | Negative       | 17         | 20     | 33                | 3         | 3        | 5        | 5        | 0           | 0         | 0              | 5                   | 7                      | 5                     | 5                   | 2                                                    | Nortriptyline 25mg BID                                                                          |                                                                             |
| c.4984G>A*           | F      | 28  | 25        | 17.3 (8.4)            | Normal   | Abnormal | Idiopathic                             | No            | No  | No     | Negative       | 85         | 36     | 100               | 9         | 9        | 10       | 9        | 0           | 10        | 0              | 9                   | 9                      | 9                     | 2                   | 4                                                    | None                                                                                            |                                                                             |
| c.4984G>A*           | F      | 24  | 22        | 10.7 (8.4)            | Normal   | Abnormal | Idiopathic                             | No            | No  | Yes    | Negative       | 57         | NA     | 81                | NA        | 7        | 9        | 6        | 8           | 5         | 4              | 7                   | 7                      | NA                    | 7                   | 3                                                    | Pregabalin 75mg BID                                                                             |                                                                             |
| c.4984G>A*           | F      | 61  | 45        | 3.3 (3.2)             | Normal   | Abnormal | Chronicitripsy                         | No            | No  | No     | Negative       | 49         | 20     | 86                | 8         | 8        | 7        | 6        | 5           | 8         | 6              | 8                   | 9                      | 9                     | 9                   | 4                                                    | Duloxetine 30mg daily, oxycodone extended release 10mg BID                                      |                                                                             |
| c.5116A>G            | M      | 62  | 61        | 0.4 (3.8)             | Abnormal | Abnormal | Idiopathic                             | No            | No  | Yes    | Negative       | 7          | 17     | 91                | 2         | 7        | 7        | 2        | 3           | 8         | 8              | 8                   | 4                      | 7                     | 3                   | 3                                                    | Amitriptyline 25mg daily                                                                        |                                                                             |
| c.5474>C             | M      | 63  | 58        | 3 (2.8)               | Normal   | Abnormal | Autoimmune disease + IGT               | No            | No  | No     | Negative       | 9          | 8      | 33                | 3         | 5        | 6        | 2        | 0           | 5         | 0              | 3                   | 1                      | 3                     | 6                   | 3                                                    | None                                                                                            |                                                                             |
| c.5539C>T            | F      | 68  | 65        | 1.8 (3.2)             | Abnormal | Abnormal | Idiopathic                             | No            | No  | Yes    | Positive       | NA         | NA     | NA                | 8         | 8        | 9        | 10       | 9           | 7         | 8              | 7                   | 3                      | 8                     | 7                   | 4                                                    | None                                                                                            |                                                                             |
| c.5606G>A            | F      | 59  | 56        | 3.1 (4.3)             | Abnormal | Abnormal | Idiopathic                             | No            | No  | No     | Positive       | 30         | 15     | 67                | 4         | 3        | 5        | 3        | 0           | 2         | 0              | 5                   | 4                      | 3                     | 2                   | 3                                                    | None                                                                                            |                                                                             |

F: female; M: male; INFD: intraepidermal nerve fibre density; TTT: temperature threshold testing; VAS: visual analogue scale (VAS is ranging from 0-100 [0 = no pain and 100 = the worst possible pain]); min: minimum; max: maximum; NPS: neuropathic pain scale (0 = not applicable to the experienced pain and 10 = in the most severe form applicable to the experienced pain); SPN-SIG: small fiber neuropathy inventory questionnaire; No. autonomic: number of positive autonomic symptoms; No. somatic: number of positive somatic symptoms; NA: not available; DM: diabetes mellitus; IGT: impaired glucose tolerance; ↓ vitamin B12: vitamin B12 deficiency; † vitamin B6: vitamin B6 intoxication; BID: twice daily; TID: three times daily; QID: four times daily. \*Variant classified as pathogenic according to the Waxman recommendations.
