# Supplementary material
Source: HighWire-hosted journal article supplement (https://jnnp.bmj.com/content/90/3/342)
Supplement: inline-supplementary-material-3 [file inline-supplementary-material-3.pdf]

Supplementary Table 3: Clinical characteristics of pure small fiber neuropathy patients with a (potentially) pathogenic *SCN11A* variant

| c position  | Gender | Age | Age debut | EMFD (5th percentile) | EMFD     | TTT      | Associated condition(s) | Erythromalgia | Ich | Cramps | Family history | Actual VAS | VASmin | VASmax | NPS Pain Severity | Sharpness | Hottness | Dullness | Coldness | Sensitivity | Itchiness | Unpleasantness | Intensity deep pain | Intensity surface pain | SFN-SQ No. autonomic | SFN-SQ No. somatic | Neuropathic pain medication at moment hospital visit |                                                   |
|-------------|--------|-----|-----------|-----------------------|----------|----------|-------------------------|---------------|-----|--------|----------------|------------|--------|--------|-------------------|-----------|----------|----------|----------|-------------|-----------|----------------|---------------------|------------------------|----------------------|--------------------|------------------------------------------------------|---------------------------------------------------|
| c.93C>T     | F      | 55  | 54        | 6.8 (4.3)             | Normal   | Abnormal | Autoimmune disease      | No            | No  | No     | Negative       | NA         | NA     | NA     | 6                 | 6         | 0        | 6        | 0        | 8           | 0         | NA             | 6                   | 8                      | 7                    | 3                  | Amtripyline 30mg daily, pregabalin 75mg BID          |                                                   |
| c.155C>T    | F      | 47  | 44        | 5.4 (5.7)             | Abnormal | Normal   | Autoimmune disease, IGT | Yes           | No  | No     | NA             | NA         | NA     | NA     | NA                | NA        | NA       | NA       | NA       | NA          | NA        | NA             | NA                  | NA                     | NA                   | NA                 | None                                                 |                                                   |
| c.151C>T    | F      | 54  | 52        | 2.9 (4.3)             | Abnormal | Abnormal | Autoimmune disease      | Yes           | No  | No     | Negative       | 91         | 71     | 98     | 10                | 9         | 9        | 10       | 9        | 5           | 0         | 10             | 10                  | 8                      | 7                    | 3                  | Amtripyline 50mg daily                               |                                                   |
| c.1090C>T   | F      | 52  | 51        | 9 (4.3)               | Normal   | Abnormal | Idiopathic              | No            | No  | No     | Negative       | 77         | 48     | 87     | 7                 | 8         | 7        | 3        | 6        | 2           | 2         | 7              | 8                   | 5                      | 4                    | 4                  | None                                                 |                                                   |
| c.1142T>C   | F      | 55  | 50        | 8.1 (4.3)             | Normal   | Abnormal | Idiopathic              | No            | Yes | No     | Positive       | 48         | 12     | 90     | 6                 | 8         | 7        | 3        | 0        | 8           | 7         | 6              | 7                   | 7                      | 5                    | 3                  | None                                                 |                                                   |
| c.1257G>T   | F      | 55  | 52        | 1.7 (4.3)             | Abnormal | Normal   | Autoimmune disease      | Yes           | No  | No     | Negative       | 64         | 16     | 81     | 8                 | 8         | 7        | 7        | 7        | 8           | 2         | NA             | 8                   | NA                     | 7                    | 4                  | Amtripyline                                          |                                                   |
| c.1257G>T   | F      | 33  | 22        | 6.1 (7.1)             | Abnormal | Normal   | Idiopathic              | No            | No  | No     | NA             | NA         | NA     | NA     | NA                | NA        | NA       | NA       | NA       | NA          | NA        | NA             | NA                  | NA                     | 9                    | 4                  | Gabapentin 300mg TID                                 |                                                   |
| c.1257G>T   | F      | 28  | 26        | 7.1 (8.4)             | Abnormal | Abnormal | Idiopathic              | No            | No  | No     | Negative       | 77         | 27     | 88     | 8                 | NA        | 10       | 7        | 9        | NA          | 0         | 8              | 8                   | 7                      | 8                    | 4                  | Tramadol 100mg daily                                 |                                                   |
| c.1257G>T   | F      | 57  | 49        | 4.3 (4.3)             | Normal   | Abnormal | Idiopathic              | No            | Yes | No     | Negative       | NA         | NA     | NA     | NA                | NA        | NA       | NA       | NA       | NA          | NA        | NA             | NA                  | NA                     | NA                   | NA                 | Capzacin creme                                       |                                                   |
| c.1257G>T   | F      | 34  | 30        | 9 (1.1)               | Normal   | Abnormal | Idiopathic              | Yes           | No  | Yes    | Negative       | NA         | NA     | NA     | 8                 | 9         | 10       | 6        | 7        | 8           | 8         | 9              | 9                   | 7                      | 9                    | 4                  | None                                                 |                                                   |
| c.1744G>A   | F      | 70  | 66        | 3.1 (2.2)             | Normal   | Abnormal | Idiopathic              | No            | No  | No     | Negative       | 52         | 16     | 59     | 6                 | 5         | 7        | 6        | 4        | 7           | 4         | 7              | 7                   | 6                      | 8                    | 4                  | Amtripyline 25mg TID, buprenorphine transdermal      |                                                   |
| c.1744G>A   | F      | 51  | 48        | 9.6 (4.3)             | Normal   | Abnormal | Idiopathic              | Yes           | No  | Yes    | Positive       | 23         | 56     | 89     | 7                 | NA        | NA       | NA       | NA       | NA          | NA        | NA             | NA                  | NA                     | 7                    | 4                  | None                                                 |                                                   |
| c.1744G>A   | F      | 69  | 49        | 7.4 (3.7)             | Normal   | Abnormal | Autoimmune disease      | No            | No  | No     | Positive       | NA         | NA     | NA     | 5                 | 4         | 4        | 4        | 5        | 5           | 5         | 6              | 5                   | 5                      | 8                    | 4                  | None                                                 |                                                   |
| c.1744G>A   | F      | 27  | 24        | 9.4 (8.4)             | Normal   | Abnormal | Idiopathic              | No            | Yes | Yes    | Negative       | 75         | 35     | 84     | 6                 | 7         | 4        | 7        | 6        | 7           | 7         | 8              | 8                   | 2                      | 9                    | 4                  | Dicyclonone on occasion                              |                                                   |
| c.1744G>A   | M      | 56  | 53        | 5.1 (3.5)             | Normal   | Abnormal | Idiopathic              | No            | No  | No     | Negative       | 20         | 3      | 62     | 3                 | 3         | 6        | 3        | 6        | 1           | 1         | NA             | 4                   | 4                      | 3                    | 2                  | Amtripyline 10mg and 25mg daily                      |                                                   |
| c.1927A>G   | M      | 70  | 67        | 8.1 (2.1)             | Normal   | Abnormal | Idiopathic              | No            | No  | No     | Negative       | 75         | 72     | 87     | 8                 | 7         | 9        | 6        | 7        | 7           | 7         | 2              | 8                   | 8                      | 8                    | 3                  | 4                                                    | None                                              |
| c.2042C>A   | M      | 74  | 65        | 4.4 (2.1)             | Normal   | Abnormal | Autoimmune disease      | No            | No  | Yes    | Negative       | 73         | 68     | 100    | 8                 | 9         | 8        | 8        | 8        | 7           | 6         | 8              | 9                   | 8                      | 7                    | 4                  | Gabapentin 400mg BID, amtripyline                    |                                                   |
| c.2095G>A   | M      | 69  | 64        | 5.7 (2.8)             | Normal   | Abnormal | Idiopathic              | Yes           | No  | No     | Positive       | NA         | NA     | NA     | NA                | NA        | NA       | NA       | NA       | NA          | NA        | NA             | NA                  | NA                     | NA                   | NA                 | None                                                 |                                                   |
| c.2419A>G   | F      | 59  | 57        | 11.2 (4.3)            | Normal   | Abnormal | DM                      | Yes           | No  | Yes    | Positive       | 36         | 23     | 70     | 3                 | 5         | 6        | 2        | 3        | 4           | 4         | 3              | 2                   | 3                      | 9                    | 4                  | None                                                 |                                                   |
| c.2419A>G   | F      | 59  | 57        | 5.7 (4.3)             | Normal   | Abnormal | Idiopathic              | No            | No  | No     | Negative       | NA         | NA     | NA     | NA                | NA        | NA       | NA       | NA       | NA          | NA        | NA             | NA                  | NA                     | NA                   | NA                 | None                                                 |                                                   |
| c.2513G>A   | M      | 59  | 56        | 0.5 (3.5)             | Abnormal | Abnormal | IGT                     | No            | No  | No     | Negative       | 68         | 49     | 91     | 8                 | 9         | 8        | 8        | 7        | 7           | 8         | 7              | 8                   | 7                      | 7                    | 4                  | Amtripyline 10mg daily                               |                                                   |
| c.2524G>C   | F      | 76  | 66        | 2.6 (2.2)             | Normal   | Abnormal | Idiopathic              | Yes           | No  | No     | Positive       | 22         | 10     | 65     | 7                 | 8         | 7        | 9        | 7        | 5           | 4         | 8              | 7                   | 9                      | 6                    | 4                  | Amtripyline                                          |                                                   |
| c.3222A>G   | M      | 39  | 38        | 7.7 (5.2)             | Normal   | Abnormal | IGT                     | No            | No  | No     | Negative       | 22         | 20     | 30     | 3                 | 4         | 2        | 4        | 0        | 1           | 0         | 4              | 3                   | 1                      | 7                    | 0                  | Carbamazepine 200mg QID, pregabalin 75mg BID         |                                                   |
| c.3473T>C   | F      | 61  | 59        | 4.8 (3.2)             | Normal   | Abnormal | Idiopathic              | No            | Yes | No     | Positive       | NA         | NA     | NA     | 7                 | 7         | 10       | 10       | 8        | 3           | 9         | 7              | 8                   | 6                      | 9                    | 4                  | None                                                 |                                                   |
| c.3473T>C   | M      | 73  | 72        | 3.1 (2.1)             | Normal   | Abnormal | Idiopathic              | No            | No  | Yes    | Negative       | 71         | 33     | 82     | 8                 | 8         | 2        | 8        | 2        | 8           | 8         | 8              | 8                   | 8                      | 8                    | 6                  | 4                                                    | Pregabalin 75 BID                                 |
| c.3473T>C** | F      | 63  | 60        | 1.0 (3.7)             | Abnormal | Abnormal | Idiopathic              | Yes           | No  | No     | NA             | 16         | 21     | 65     | 5                 | 6         | 7        | 5        | 6        | 5           | 3         | 5              | 3                   | 3                      | 6                    | 4                  | Gabapentin 300mg daily                               |                                                   |
| c.3745G>A   | M      | 51  | 50        | 6.1 (3.5)             | Normal   | Abnormal | Idiopathic              | Yes           | No  | Yes    | Negative       | 65         | 38     | 86     | 7                 | 8         | 8        | 6        | 0        | 4           | 0         | 7              | 8                   | 7                      | 7                    | 4                  | None                                                 |                                                   |
| c.4049G>A   | F      | 46  | 30        | 5.8 (5.7)             | Abnormal | Abnormal | Idiopathic              | No            | No  | Yes    | Positive       | 62         | 16     | 88     | 6                 | 3         | 7        | 5        | 3        | 6           | 7         | 8              | 7                   | 4                      | 9                    | 4                  | None                                                 |                                                   |
| c.4049G>A   | F      | 32  | 30        | 11.4 (7.1)            | Normal   | Abnormal | Idiopathic              | No            | No  | No     | Negative       | 65         | 22     | 91     | 6                 | 8         | 8        | 5        | 9        | 6           | 7         | 4              | 8                   | 5                      | 7                    | 2                  | Pregabalin 150mg and 300mg                           |                                                   |
| c.4957T>G>A | F      | 45  | 42        | 8 (1.7)               | Normal   | Abnormal | Idiopathic              | No            | No  | Yes    | Positive       | 5          | 0      | 30     | 3                 | 6         | 1        | 6        | 0        | 8           | 6         | 5              | NA                  | NA                     | 8                    | 4                  | None                                                 |                                                   |
| c.4382G>A   | M      | 59  | 55        | 0.4 (3.5)             | Abnormal | Normal   | Idiopathic              | Yes           | No  | No     | Negative       | 36         | 11     | 65     | 3                 | 7         | 7        | 6        | 0        | 1           | 4         | 10             | 2                   | 9                      | 0                    | 3                  | Lamotrigine 100mg BID                                |                                                   |
| c.4309G>A   | M      | 44  | 42        | 6.3 (4.4)             | Normal   | Abnormal | Idiopathic              | No            | No  | No     | Negative       | 84         | NA     | 93     | 9                 | 10        | 8        | 4        | 4        | 4           | 8         | 4              | 10                  | 9                      | 9                    | 8                  | 4                                                    | None                                              |
| c.5067C>G   | F      | 20  | 19        | 7.3 (8.4)             | Abnormal | Abnormal | Autoimmune disease      | No            | No  | No     | Negative       | NA         | NA     | NA     | NA                | NA        | NA       | NA       | NA       | NA          | NA        | NA             | NA                  | NA                     | NA                   | NA                 | NA                                                   | Nortriptyline 30mg daily, gabapentine 300mg daily |

F: female; M: male; EMFD: intraepidermal nerve fiber density; TTT: temperature threshold testing; VAS: visual analogue scale (VAS is ranging from 0-100 (0 = no pain and 100 = the worst possible pain)); min: minimum; max: maximum; NPS: neuropathic pain scale (0 = not applicable to the experienced pain and 10 = in the most severe form applicable to the experienced pain); SFN-SQ: small fiber neuropathy inventory questionnaire; No. autonomic: number of positive autonomic symptoms; No. somatic: number of positive somatic symptoms; NA: not available; DM: diabetes mellitus; IGT: impaired glucose tolerance; BID: twice daily; TID: three times daily; QID: four times daily.  
 \*\*Also *SCN11A* variant c.1555G>A; p.(Glu518Val).
